# Supplementary material for: Investigating interprofessional competence needs for on-demand virtual consultations in home-hospital care: an interpretive description study to inform the development of educational materials
Source: Research Square preprint supplement (doi:10.21203/rs.3.rs-8384915/v1), 2026-01-29
Supplement: Supplementary file 2 [file f24d72672aa0c68d6f4faed7.pdf]

## SUPPLEMENTARY FILE 2

| INTERVIEW GUIDE, FOCUS GROUP INTERVIEW                                                                                                                                                                                                                                                                                                                                                                                                                              |                                                                                                                                                                                                                                                                                                                                                                                                                                                                                                                                                                                                                                                                                                                                                                                                                                                                                                                                                                                                                                                           |
|---------------------------------------------------------------------------------------------------------------------------------------------------------------------------------------------------------------------------------------------------------------------------------------------------------------------------------------------------------------------------------------------------------------------------------------------------------------------|-----------------------------------------------------------------------------------------------------------------------------------------------------------------------------------------------------------------------------------------------------------------------------------------------------------------------------------------------------------------------------------------------------------------------------------------------------------------------------------------------------------------------------------------------------------------------------------------------------------------------------------------------------------------------------------------------------------------------------------------------------------------------------------------------------------------------------------------------------------------------------------------------------------------------------------------------------------------------------------------------------------------------------------------------------------|
| <p><b>Briefing:</b> The interview begins with introductions of the participants, then a brief introduction of the purpose of the focus group and some light small talk to establish trust. This is followed by a conversation about the participant's daily experiences with the issue under investigation – specifically the use of acute virtual consultations to support clinical decision-making for patients who have undergone plastic or breast surgery.</p> |                                                                                                                                                                                                                                                                                                                                                                                                                                                                                                                                                                                                                                                                                                                                                                                                                                                                                                                                                                                                                                                           |
| <b>Research question:</b>                                                                                                                                                                                                                                                                                                                                                                                                                                           | <b>Interview question:</b>                                                                                                                                                                                                                                                                                                                                                                                                                                                                                                                                                                                                                                                                                                                                                                                                                                                                                                                                                                                                                                |
| Non-directive questions                                                                                                                                                                                                                                                                                                                                                                                                                                             | <p>Please tell me about your experiences or reflections related to your decision-making when considering whether to call in an acute patient for an in-person consultation during evening or night shifts</p> <p>Follow-up questions:<br/>Please elaborate on that.<br/>When you say..., please provide an example.</p>                                                                                                                                                                                                                                                                                                                                                                                                                                                                                                                                                                                                                                                                                                                                   |
| <p><b>Theme: Personal uncertainty and departmental culture</b><br/>(Based on the interviewer's preconceptions as informed by the user journey mappings)</p>                                                                                                                                                                                                                                                                                                         | <p>This relates to clinical decision-making.<br/>Please share your experiences regarding how you make clinical decisions about whether or not to call a patient into the department.</p> <ul style="list-style-type: none"> <li>• Please describe a situation in which you decided to call a patient in.</li> <li>• What factors influenced your decision in that instance?</li> <li>• Was there anything in particular about this patient that stood out?</li> <li>• Did the patient live close by or at a greater distance?</li> </ul> <p>Please share an example of a situation in which you felt that it was the right decision to call the patient in?<br/>And an example of a situation in which you retrospectively felt that it may not have been the right decision?</p> <ul style="list-style-type: none"> <li>• What considerations played a role in your decision to call the patient in?</li> <li>• Do you think your clinical experience influenced your judgement in that case?</li> <li>• Please elaborate a bit more on that.</li> </ul> |
| <p><b>Theme: The patient's uncertainty and concern</b><br/>(Based on the interviewer's preconceptions as informed by the user journey mappings)</p>                                                                                                                                                                                                                                                                                                                 | <p>Please share your experiences with uncertain or worried patients and how such concerns influenced your clinical decision-making regarding whether or not to call the patient into the department.</p> <ul style="list-style-type: none"> <li>• Who was the concerned or worried patient?</li> <li>• Was there anything unusual about this patient or their situation?</li> </ul>                                                                                                                                                                                                                                                                                                                                                                                                                                                                                                                                                                                                                                                                       |

|                                                                                                                                                                               |                                                                                                                                                                                                                                                                                                                                                                                                                                                                                                                                                                                                                                                                      |
|-------------------------------------------------------------------------------------------------------------------------------------------------------------------------------|----------------------------------------------------------------------------------------------------------------------------------------------------------------------------------------------------------------------------------------------------------------------------------------------------------------------------------------------------------------------------------------------------------------------------------------------------------------------------------------------------------------------------------------------------------------------------------------------------------------------------------------------------------------------|
|                                                                                                                                                                               | <ul style="list-style-type: none"> <li>On what basis did you decide to call the patient in?</li> </ul> <p>Please provide an example of a specific situation in which you felt it was the right decision to call the patient in.</p> <p>Please share an example of a situation in which, in retrospect, you felt that calling the patient in may not have been the right decision.</p> <ul style="list-style-type: none"> <li>What determined your decision to call the patient in?</li> <li>Do you think that there is a connection between that decision and your clinical experience?</li> </ul>                                                                   |
| <b>Theme: Utopia</b><br><br>(Based on the interviewer's preconceptions regarding the development of competencies for clinical decision-making in acute virtual consultations) | <p>Please provide suggestions regarding what you believe is needed in order for acute virtual consultations to become meaningful in clinical practice.</p> <p>Please share what you think is required to develop the necessary competencies for making clinical decisions in the context of acute virtual consultations.</p> <p>Please complete the following sentences:</p> <p>In this way... we would truly be strengthening our competencies for clinical decision-making in acute virtual consultations.</p> <p>It would be ideal if...</p> <p>It would be meaningful if...</p> <p>Would you be willing to elaborate on that?<br/>Please provide an example.</p> |
| <b>Closing Remarks/debriefing</b>                                                                                                                                             | <p>That brings us to the end of the interview. Thank you very much for your participation.</p> <p>We really appreciate you taking the time to share your experiences and reflections - your insights are highly valuable to the study.</p>                                                                                                                                                                                                                                                                                                                                                                                                                           |
